# Supplementary material
Source: HighWire-hosted journal article supplement (http://rc.rcjournal.com/highwire/filestream/11878/field_highwire_adjunct_files/0/RC-01312.R2_Cross_Suppl_Aug_2012.pdf)

**Appendix 1. MCT Treatment Protocol**

**Appendix 2. Contra-indications and risk factors for MCT**

**Appendix 3. MCT treatment positions**

**Appendix 4. MCT treatment definitions**

| <b>MANUAL CHEST THERAPY TREATMENT PROTOCOL</b>                                                                                                                                                                                                                                   |                                                                                                                                                                                                                                                                                                                                                                                                                                                                                    |
|----------------------------------------------------------------------------------------------------------------------------------------------------------------------------------------------------------------------------------------------------------------------------------|------------------------------------------------------------------------------------------------------------------------------------------------------------------------------------------------------------------------------------------------------------------------------------------------------------------------------------------------------------------------------------------------------------------------------------------------------------------------------------|
| This treatment protocol provides a generic tool for the evaluation of MCT. The content, number and duration of treatments will be at the discretion of the physical therapist applying the therapy and varied according to clinical need within the bounds set by this protocol. |                                                                                                                                                                                                                                                                                                                                                                                                                                                                                    |
| <b>1.0 IDENTIFYING PATIENTS SUITABLE FOR MCT</b>                                                                                                                                                                                                                                 |                                                                                                                                                                                                                                                                                                                                                                                                                                                                                    |
| 1.1                                                                                                                                                                                                                                                                              | Identify possible contra-indications and risk factors for MCT (refer to Appendix 2)                                                                                                                                                                                                                                                                                                                                                                                                |
| 1.2                                                                                                                                                                                                                                                                              | MCT is recommended if the patient's condition gives cause for concern and the following apply: <ul style="list-style-type: none"> <li>1.2.1 Clinical evidence of sputum retention (e.g. on auscultation and/or chest x ray)</li> <li>1.2.2 Arterial blood gases: pH less than 7.26</li> <li>1.2.3 Arterial blood gases: rising CO<sub>2</sub></li> <li>1.2.4 Already receiving controlled oxygen therapy</li> <li>1.2.5 Already receiving other supportive treatment(s)</li> </ul> |
| 1.3                                                                                                                                                                                                                                                                              | On the basis of 1.1 & 1.2, make clinical judgement as to patient's suitability for MCT                                                                                                                                                                                                                                                                                                                                                                                             |
| <b>2.0 PRIOR TO MCT</b>                                                                                                                                                                                                                                                          |                                                                                                                                                                                                                                                                                                                                                                                                                                                                                    |
| 2.1                                                                                                                                                                                                                                                                              | Implement universal infection control precautions                                                                                                                                                                                                                                                                                                                                                                                                                                  |
| 2.2                                                                                                                                                                                                                                                                              | Observe any additional patient-specific precautions posted                                                                                                                                                                                                                                                                                                                                                                                                                         |
| 2.3                                                                                                                                                                                                                                                                              | Record baseline oxygen saturation                                                                                                                                                                                                                                                                                                                                                                                                                                                  |
| 2.4                                                                                                                                                                                                                                                                              | If receiving, patient to continue on controlled oxygen therapy                                                                                                                                                                                                                                                                                                                                                                                                                     |
| 2.5                                                                                                                                                                                                                                                                              | If available, obtain continuous oximetry data during intervention                                                                                                                                                                                                                                                                                                                                                                                                                  |
| 2.6                                                                                                                                                                                                                                                                              | Record any additional vital signs deemed necessary                                                                                                                                                                                                                                                                                                                                                                                                                                 |
| <b>3.0 DELIVERING MCT</b>                                                                                                                                                                                                                                                        |                                                                                                                                                                                                                                                                                                                                                                                                                                                                                    |
| 3.1                                                                                                                                                                                                                                                                              | Auscultate patient                                                                                                                                                                                                                                                                                                                                                                                                                                                                 |
| 3.2                                                                                                                                                                                                                                                                              | Select 2 most appropriate positions according to clinical findings (refer to Appendix 3) <ul style="list-style-type: none"> <li>3.2.1 Turn patient to position 1</li> <li>3.2.2 Use pillows to support patient as required</li> <li>3.2.3 Place light towel (one layer) on area of chest to be percussed</li> </ul>                                                                                                                                                                |
| 3.3                                                                                                                                                                                                                                                                              | Encourage patient to breathe deeply during treatment                                                                                                                                                                                                                                                                                                                                                                                                                               |
| 3.4                                                                                                                                                                                                                                                                              | <b>Percuss*</b> thorax with cupped hand(s) directly over the lung segment(s) being drained. <ul style="list-style-type: none"> <li>3.4.1 Use both/one hand as deemed necessary</li> <li>3.4.2 Adapt rate, depth and force of technique to meet individual needs</li> </ul>                                                                                                                                                                                                         |
| 3.5                                                                                                                                                                                                                                                                              | <b>Vibrate*</b> chest over percussed area using two hands <ul style="list-style-type: none"> <li>3.5.1 Vibrate on each exhalation</li> <li>3.5.2 Adapt rate, depth and force of technique to meet individual needs</li> </ul>                                                                                                                                                                                                                                                      |
| 3.6                                                                                                                                                                                                                                                                              | Encourage <b>cough*</b> (spontaneous, directed, FET, manually assisted as deemed necessary) <ul style="list-style-type: none"> <li>3.6.1 Provide patient with pot to collect expectorate</li> <li>3.6.2 Repeat alternate percussion and vibration in short bursts</li> <li>3.6.3 Encourage cough between each cycle</li> <li>3.6.4 Repeat till 2 consecutive attempts at cough produce no further expectorate</li> </ul>                                                           |
| <b>* For definitions and descriptions of percussion, vibration &amp; cough, refer to Appendix 4.</b>                                                                                                                                                                             |                                                                                                                                                                                                                                                                                                                                                                                                                                                                                    |
| 3.7                                                                                                                                                                                                                                                                              | Turn patient to position 2                                                                                                                                                                                                                                                                                                                                                                                                                                                         |
| 3.8                                                                                                                                                                                                                                                                              | Repeat 3.4 to 3.6                                                                                                                                                                                                                                                                                                                                                                                                                                                                  |
| 3.9                                                                                                                                                                                                                                                                              | Modify treatment within above parameters depending on patient's condition/tolerance                                                                                                                                                                                                                                                                                                                                                                                                |
| 3.10                                                                                                                                                                                                                                                                             | Select further position(s) if deemed necessary                                                                                                                                                                                                                                                                                                                                                                                                                                     |
| 3.11                                                                                                                                                                                                                                                                             | After last position, return patient to original/suitable position                                                                                                                                                                                                                                                                                                                                                                                                                  |
| 3.12                                                                                                                                                                                                                                                                             | Record main treatment parameters (i.e. positions & total time taken to deliver MCT)                                                                                                                                                                                                                                                                                                                                                                                                |
| 3.13                                                                                                                                                                                                                                                                             | Record major deviations from treatment protocol with brief explanation                                                                                                                                                                                                                                                                                                                                                                                                             |
| 3.14                                                                                                                                                                                                                                                                             | Monitor and record oxygen saturation until return to baseline                                                                                                                                                                                                                                                                                                                                                                                                                      |

| <b>4.0 ADVERSE EVENTS</b>                                                                                                                                                                                                                                                           | <b>OBSERVATION</b>                                                         |
|-------------------------------------------------------------------------------------------------------------------------------------------------------------------------------------------------------------------------------------------------------------------------------------|----------------------------------------------------------------------------|
| <b>4.1 If the patient shows signs of increased intracranial pressure</b><br>4.1.1 Stop therapy<br>4.1.2 Start emergency Medical Procedure as per organisational policy                                                                                                              | Disorientation, loss of consciousness, enlarged pupils, headache, vomiting |
| <b>4.2 If the patient shows signs of acute hypotension</b><br>4.2.1 Stop therapy<br>4.2.2 Start emergency Medical Procedure as per organisational policy                                                                                                                            | Pallor, sweating, decreased consciousness.                                 |
| <b>4.3 If the patient suffers a pulmonary haemorrhage</b><br>4.3.1 Stop therapy<br>4.3.2 Start emergency Medical Procedure as per organisational policy                                                                                                                             | Visible loss of blood                                                      |
| <b>4.4 If the patient shows signs of dysrhythmia</b><br>4.4.1 Stop therapy<br>4.4.2 Start emergency Medical Procedure as per organisational policy                                                                                                                                  | Pallor, sweating, chest pain, decreased consciousness.                     |
| <b>4.5 If the patient vomits &amp; aspirates</b><br>4.5.1 Stop therapy and position patient appropriately<br>4.5.2 Clear airway and suction as needed<br>4.5.3 Administer oxygen<br>4.5.4 Maintain airway<br>4.5.5 Contact appropriate physician                                    | Visible vomit, harsh breathing, oropharyngeal sounds, prolonged coughing.  |
| <b>4.6 If the patient becomes hypoxic</b><br>4.6.1 Stop therapy<br>4.6.2 Administer controlled oxygen therapy<br>4.6.3 Return patient to previous/suitable resting position<br>4.6.4 Contact appropriate physician<br>4.6.5 Ensure adequate ventilation                             | Falling O <sub>2</sub> sats. tachpnoea, blue lips, tachycardia, confusion  |
| <b>4.7 If the patient shows signs of bronchospasm</b><br>4.7.1 Stop therapy<br>4.7.2 Return patient to previous/suitable resting position<br>4.7.3 Consider administering/increasing oxygen delivery<br>4.7.4 Consider use of broncodilators<br>4.7.5 Consult appropriate physician | Tight chest, audible wheeze, abdominal paradox.                            |
| <b>4.8 If the patient suffers pain or injury to muscles, ribs, or spine</b><br>4.8.1 Stop therapy associated with pain or problem<br>4.8.2 Exercise care in moving patient<br>4.8.3 Consult appropriate physician if deemed necessary                                               | Patient verbal and/or non verbal response to MCT treatment.                |
| <b>For all adverse events follow organisational policy on incident reporting</b>                                                                                                                                                                                                    |                                                                            |

| CONTRA-INDICATIONS FOR MCT                                                                                                                                                                                                                                                                                                                                       |     |           |           |                             |                                            |
|------------------------------------------------------------------------------------------------------------------------------------------------------------------------------------------------------------------------------------------------------------------------------------------------------------------------------------------------------------------|-----|-----------|-----------|-----------------------------|--------------------------------------------|
| The following conditions are contra-indications for MCT. Observe the patient and consult their medical notes and other sources of medical information to ascertain whether any are present.                                                                                                                                                                      |     |           |           |                             |                                            |
| CONTRA-INDICATION                                                                                                                                                                                                                                                                                                                                                | YES | NO        | NOT KNOWN |                             |                                            |
| Unstable head/neck injury                                                                                                                                                                                                                                                                                                                                        |     |           |           |                             |                                            |
| Frank haemoptysis                                                                                                                                                                                                                                                                                                                                                |     |           |           |                             |                                            |
| Bronchial hyper-reactivity                                                                                                                                                                                                                                                                                                                                       |     |           |           |                             |                                            |
| Osteoporosis                                                                                                                                                                                                                                                                                                                                                     |     |           |           |                             |                                            |
| Respiratory system malignancy                                                                                                                                                                                                                                                                                                                                    |     |           |           |                             |                                            |
| Recent spinal surgery/injury                                                                                                                                                                                                                                                                                                                                     |     |           |           |                             |                                            |
| Raised intracranial pressure                                                                                                                                                                                                                                                                                                                                     |     |           |           |                             |                                            |
| Uncontrolled hypertension (diastolic > 110)                                                                                                                                                                                                                                                                                                                      |     |           |           |                             |                                            |
| Pulmonary Embolism                                                                                                                                                                                                                                                                                                                                               |     |           |           |                             |                                            |
| Coagulopathy (platelets <50)                                                                                                                                                                                                                                                                                                                                     |     |           |           |                             |                                            |
| Coagulopathy INR >3                                                                                                                                                                                                                                                                                                                                              |     |           |           |                             |                                            |
| Bronchopleural Fistula                                                                                                                                                                                                                                                                                                                                           |     |           |           |                             |                                            |
| Subcutaneous Emphysema                                                                                                                                                                                                                                                                                                                                           |     |           |           |                             |                                            |
| Left Ventricular Failure as primary diagnosis                                                                                                                                                                                                                                                                                                                    |     |           |           |                             |                                            |
| No evidence of excess sputum production *                                                                                                                                                                                                                                                                                                                        |     |           |           |                             |                                            |
| * If it is difficult to assess whether the patient does/does not suffer from excess sputum production, apply the following screening questions: <ul style="list-style-type: none"> <li>• Do you normally produce phlegm?</li> <li>• Are you producing more phlegm than you do when you are well</li> <li>• Do you feel you have phlegm on your chest?</li> </ul> |     |           |           |                             |                                            |
| RISK FACTORS FOR MCT                                                                                                                                                                                                                                                                                                                                             |     |           |           |                             |                                            |
| The following risk factors impact on patient suitability for MCT. Assess their likely presence/absence and use your clinical judgement to decide whether MCT is appropriate for this patient.                                                                                                                                                                    |     |           |           |                             |                                            |
| RISK FACTOR                                                                                                                                                                                                                                                                                                                                                      | NO  | NOT KNOWN | YES       | Suitable for MCT?<br>(✓, x) | Reason<br>(brief explanation for decision) |
| Pleural effusion                                                                                                                                                                                                                                                                                                                                                 |     |           |           |                             |                                            |
| Pulmonary TB                                                                                                                                                                                                                                                                                                                                                     |     |           |           |                             |                                            |
| Empyema                                                                                                                                                                                                                                                                                                                                                          |     |           |           |                             |                                            |
| Lung contusion                                                                                                                                                                                                                                                                                                                                                   |     |           |           |                             |                                            |
| Rib fracture                                                                                                                                                                                                                                                                                                                                                     |     |           |           |                             |                                            |
| Flail Chest                                                                                                                                                                                                                                                                                                                                                      |     |           |           |                             |                                            |
| Wound/healing tissue on thorax                                                                                                                                                                                                                                                                                                                                   |     |           |           |                             |                                            |
| Recent spinal infusion/anaesthesia                                                                                                                                                                                                                                                                                                                               |     |           |           |                             |                                            |
| Distended abdomen                                                                                                                                                                                                                                                                                                                                                |     |           |           |                             |                                            |
| Patient reports chest-wall pain                                                                                                                                                                                                                                                                                                                                  |     |           |           |                             |                                            |
| Patient confused and/or anxious                                                                                                                                                                                                                                                                                                                                  |     |           |           |                             |                                            |
| Contra-indications and risk factors taken from:<br>AARC Clinical Practice Guideline, Postural Drainage Therapy, Respiratory Care 1991;36(12):1418-26.                                                                                                                                                                                                            |     |           |           |                             |                                            |

| <b>APPENDIX 3: MCT TREATMENT POSITIONS</b>                                                                                                                                                                                                                     |                                                                |
|----------------------------------------------------------------------------------------------------------------------------------------------------------------------------------------------------------------------------------------------------------------|----------------------------------------------------------------|
| <p>According to clinical findings, select TWO most appropriate positions.<br/> Further positions from this list can also be selected if deemed necessary<br/> If an alternative position is chosen, record the position and reason for protocol deviation.</p> |                                                                |
| <b>1. Propped - right</b><br><br>[Insert position 1 image here]                                                                                                                                                                                                | <b>2. Propped – left</b><br><br>[Insert position 2 image here] |
| <b>3. Flat - right</b><br><br>[Insert position 3 image here]                                                                                                                                                                                                   | <b>4. Flat - left</b><br><br>[Insert position 4 image here]    |
| <b>5. Tipped* – right</b><br><br>[Insert position 5 image here]                                                                                                                                                                                                | <b>6. Tipped* - left</b><br><br>[Insert position 6 image here] |
| * range 15 <sup>0</sup> - 20 <sup>0</sup>                                                                                                                                                                                                                      |                                                                |

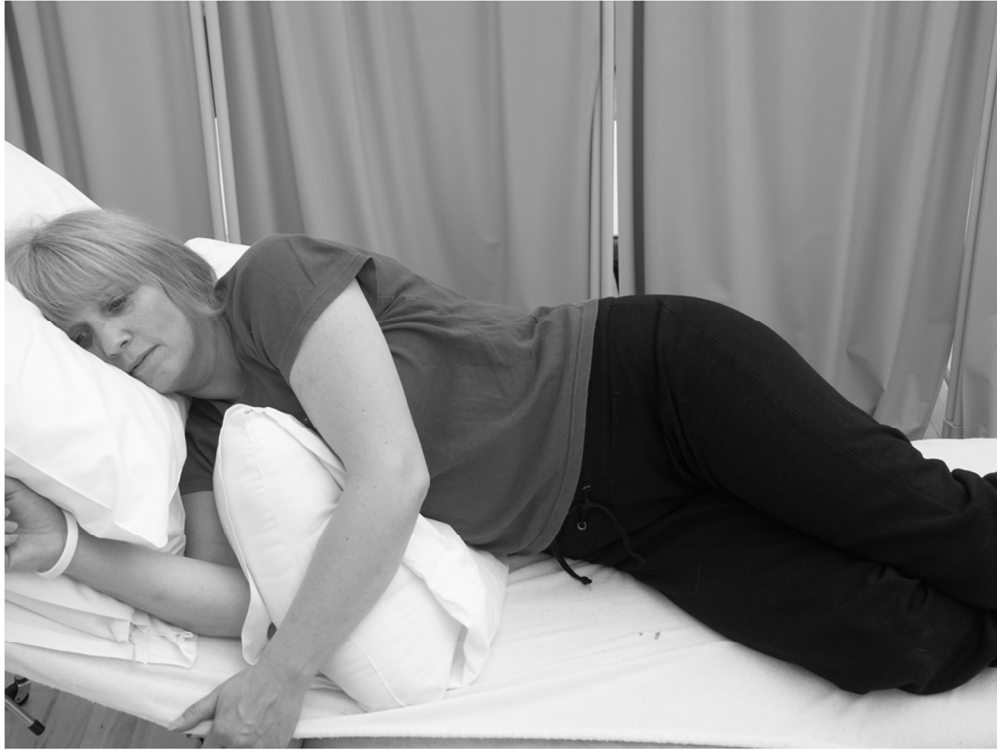

277x208mm (96 x 96 DPI)

review

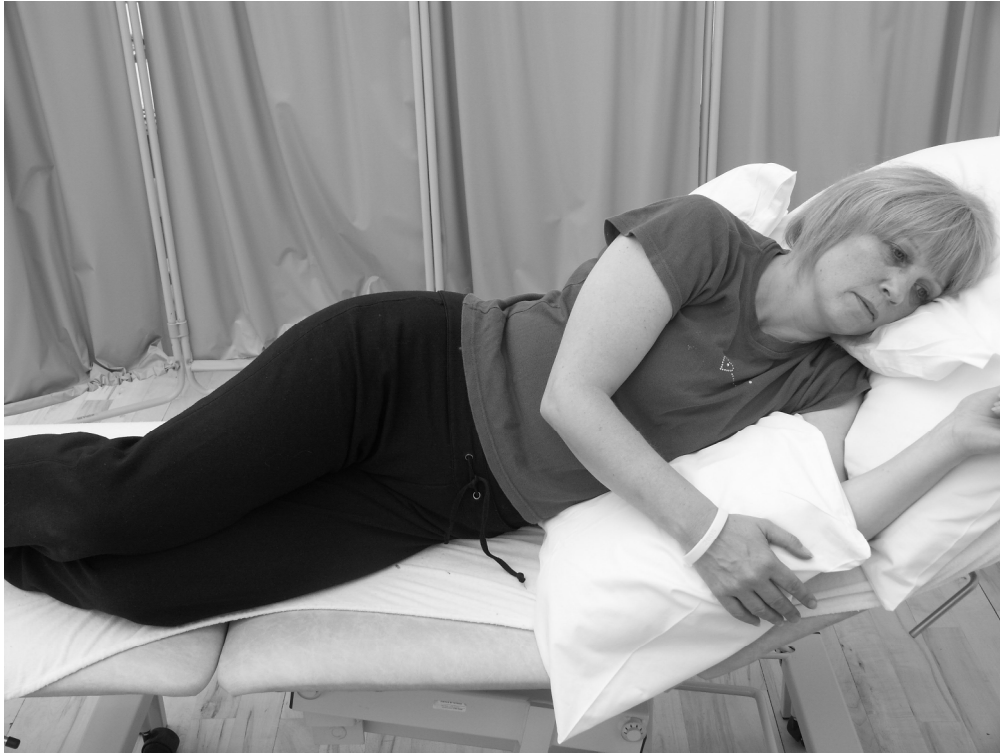

276x207mm (300 x 300 DPI)

Review

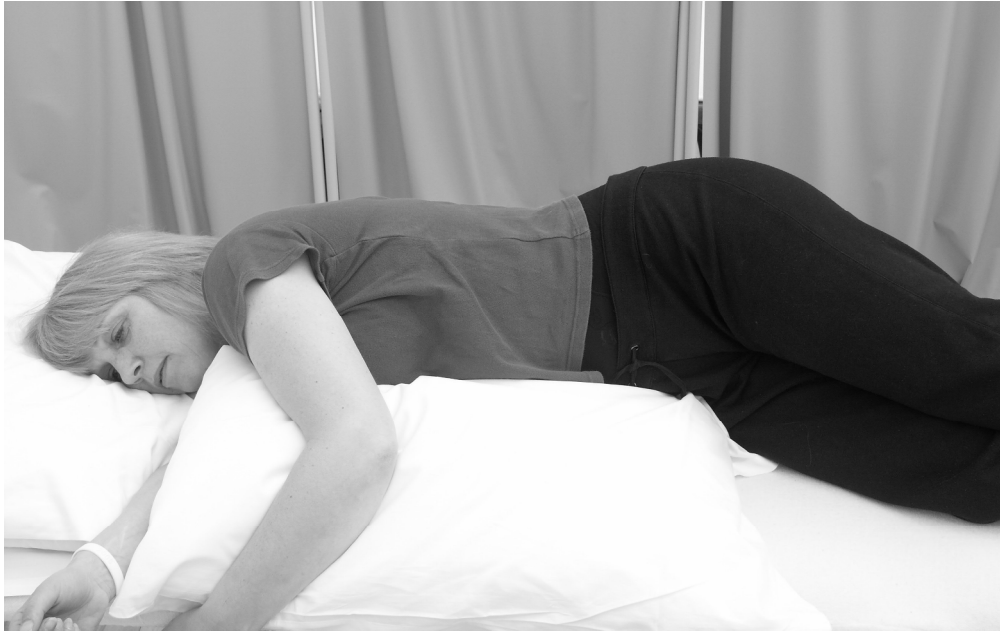

863x542mm (96 x 96 DPI)

Review



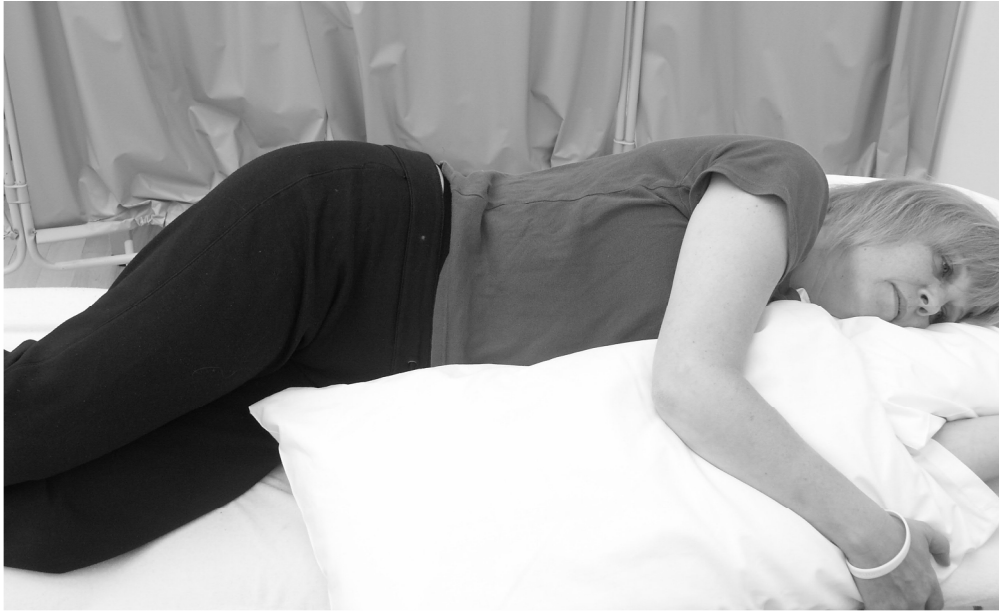

729x443mm (96 x 96 DPI)

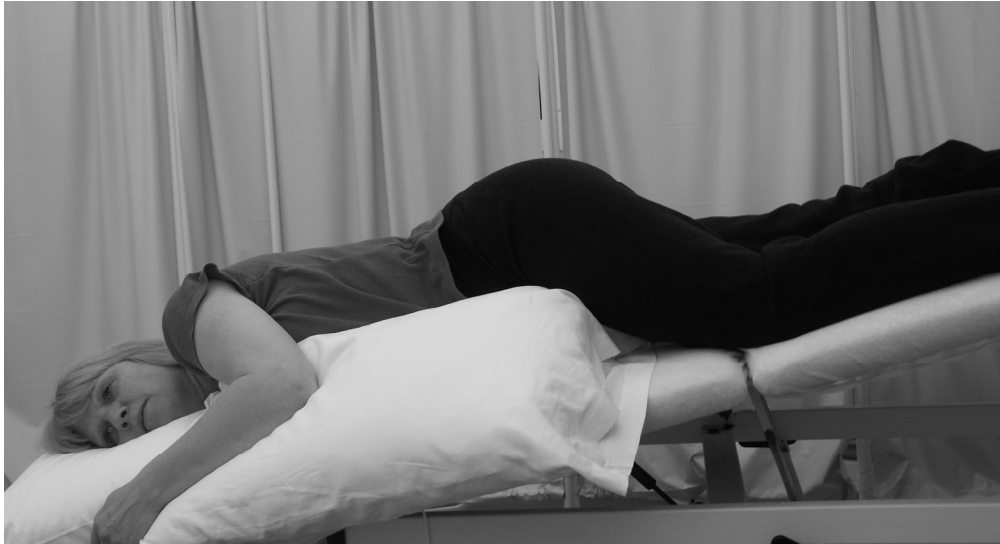

781x424mm (96 x 96 DPI)

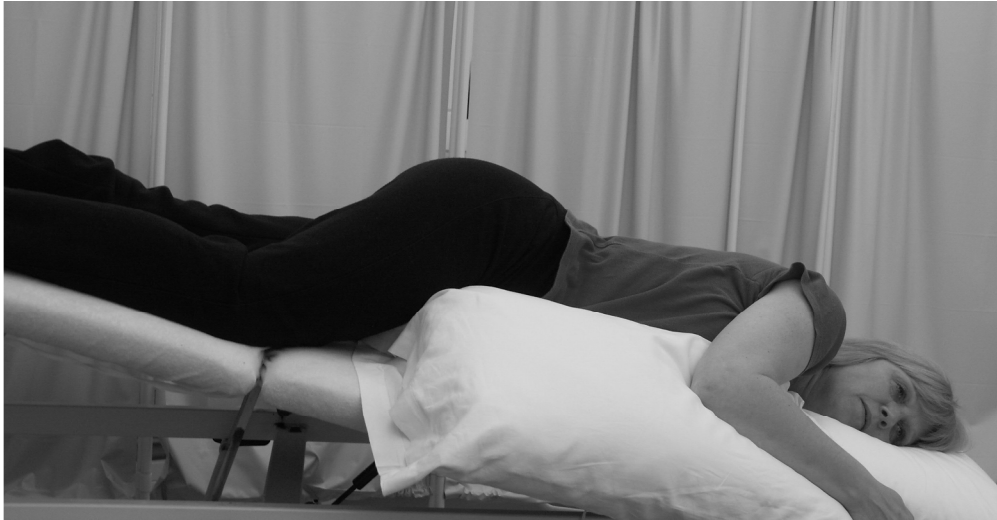

781x405mm (96 x 96 DPI)

Peer Review

## **Appendix 4: Manual Chest Therapy – treatment definitions**

### **1. Turning**

Turning is the rotation of the body around the longitudinal axis to promote unilateral or bilateral lung expansion (1,2) and improve arterial oxygenation (3,4). Regular turning can be to either side or the prone position (5) with the bed at any degree of inclination (as indicated and tolerated). Patients either turn themselves, are turned by the therapist or using a special bed or device (2,3,6-8).

### **2. Postural drainage**

Postural drainage is the drainage of secretions by the effect of gravity, from one or more lung segments to the central airways where they can be removed by cough or mechanical aspiration (9-17). Each position consists of placing the target lung segment(s) superior to the carina. Positions are generally held for 3-15 minutes but may be held for longer in particular situations (10, 12, 13, 16-21). Standard positions are often modified by the therapist depending on the patient's condition and tolerance.

### **3. Percussion**

Percussion involves the external manipulation of the thorax. It is also referred to as cupping, clapping, and tapotement. The purpose of percussion is to intermittently apply kinetic energy to the chest wall and lung. This is accomplished by using a cupped hand (Figure 1) with rhythmical flexion and extension action of the wrist.

#### **Figure 1.** Cupped hand position adopted during percussion

The force of percussion should be adapted to suit the individual. The technique is often done with two hands but, depending on the lung segment being drained, it may be more appropriate to use one hand. No conclusive evidence demonstrates the superiority of one method over the other (10,13,22-25).

To minimise the risk of desaturation in patients with moderate or severe lung disease, it is recommended that percussion is performed in 15-20 second 'bursts' with pauses for 5 seconds or longer between bouts (26).

#### **4. Vibration**

Vibration involves the application of a tremorous action over the area being drained. This is performed by manually pressing with both hands (Figure 2) in the direction of the normal movement of the ribs during expiration. The vibratory action may be coarse or fine. No conclusive evidence supports the efficacy of vibration or an optimum frequency of delivery (9,10,12,19,20,27-33).

**Figure 2.** Hand position adopted during vibration

#### **5. Cough**

A *spontaneous effective cough* is a reflex mechanism utilizing maximum forced exhalation to clear irritants or secretions from the airway. The forced exhalation is preceded by a maximal inspiratory effort followed by closure of the glottis. Contraction of expiratory muscles produces increased intrathoracic pressures against the closed glottis, which culminates in an explosive release of gas at high velocity as the glottis opens (34).

*Directed cough* seeks to mimic the attributes of an effective spontaneous cough to help to provide voluntary control over this reflex and to compensate for physical limitations. For example; by increasing glottic control, inspiratory and expiratory muscle strength, coordination, and airway stability (34).

*Forced Expiratory Technique* (FET), also known as "huff coughing," consists of one or two huffs (forced expirations) from mid-to-low lung volumes with the glottis open followed by a period of relaxed, controlled diaphragmatic breathing (34). The process is repeated until maximal bronchial clearance is obtained. It can be reinforced by self-compression of the chest wall using a brisk adduction movement of the upper arms.

*Manually assisted cough* is the external application of mechanical pressure to the epigastric region or thoracic cage coordinated with forced exhalation (34).

## 6. References

1. Miller RD, Fowler WS, Helmholz F. Changes of relative volume and ventilation of the two lungs with change to the lateral decubitus position. *J Lab & Clin Med* 1956;47(2):297-304.
2. Schimmel L, Civetta JM, Kirby RR. A new mechanical method to influence pulmonary perfusion in critically ill patients. *Crit Care Med* 1977;5(6):277-279.
3. Piehl MA, Brown RS. Use of extreme position changes in acute respiratory failure. *Crit Care Med* 1976;4(1):13-14.
4. Chulay M, Brown J, Summer W. Effect of post-operative immobilization after coronary artery bypass surgery. *Crit Care Med* 1982;10(3):176-179.
5. Douglas WW, Rehder K, Beynen FM, Sessler AD, Marsh HM. Improved oxygenation in patients with acute respiratory failure: the prone position. *Am Rev Respir Dis* 1977;115(4):559-566.
6. Gentilello L, Thompson DA, Tonnesen AS, Hernandez D, Kapadia AS, Allen SJ, et al. Effect of a rotating bed on the incidence of pulmonary complications in critically ill patients. *Crit Care Med* 1988;16(8):783-786.
7. Summer WR, Curry P, Haponik EF, Nelson S, Elston R. Continuous mechanical turning of

intensive care unit patients shortens length of stay in some diagnostic-related groups. *J Crit Care* 1989;4:45-53.

8. Fink MP, Helsmoortel CM, Stein KL, Lee PC, Cohn SM. The efficacy of an oscillating bed in the prevention of lower respiratory tract infection in critically ill victims of blunt trauma: a prospective study. *Chest* 1990; 97(1):132-137.

9. Bateman JRM, Newman SP, Daunt KM, Pavis D, Clarke SW. Regional lung clearance of excessive bronchial secretions during chest physiotherapy in patients with stable chronic airways obstruction. *Lancet* 1979;1(8111):294-297.

10. Bateman JRM, Newman SP, Daunt KM, Sheahan NF, Pavia D, Clarke SW. Is cough as effective as chest physiotherapy in the removal of excessive tracheo-bronchial secretions? *Thorax* 1981;36(9):683-687.

11. Sutton PP, Parker RA, Webber BA, Newman SP, Garland N, Lopez-Vidriero MT, et al. Assessment of the forced expiration technique postural drainage and directed coughing in chest physiotherapy. *Eur J Respir Dis* 1983;64(1):62-68.

12. Lorin MP, Denning CR. Evaluation of postural drainage by measurement of sputum volume and consistency. *Am J Phys Med* 1971;50(5):215-219.

13. Murphy MB, Concannon D, Fitzgerald MX. Chest percussion: help or hindrance to postural drainage? *Irish Med J* 1983;76(4):189-190.

14. Mackenzie CF, Shin B, Hadi F, Imle PC. Changes in total lung/thorax compliance following chest physiotherapy. *Anesth Analg* 1980;59(3):207-210.

15. Lord GP, Hiebert CA, Francis DT. A clinical, radiologic and physiologic evaluation of chest physiotherapy. *J Maine Med Assoc* 1972;63:142-145.

16. Marini JJ, Pierson DJ, Hudson LD. Acute lobar atelectasis: a prospective comparison of fiberoptic broncho-scopy and respiratory therapy. *Am Rev Respir Dis* 1979;119(6):971-978.

17. May DB, Munt PW. Physiologic effects of chest percussion and postural drainage in patients with stable chronic bronchitis. *Chest* 1979;75(1):29-32.

18. DeBoeck C, Zinman R. Cough versus chest physiotherapy: a comparison of the acute effects on pulmonary function in patients with cystic fibrosis. *Am Rev Respir Dis* 1984;129(1):182-184.
19. Campbell AH, O'Connell JM, Wilson F. The effect of chest. physiotherapy upon the FEV1 in chronic bronchitis *Med J Aust* 1975;1(2):33-35.
20. Feldman J, Traver GA, Taussig LM. Maximal expiratory flows after postural drainage. *Am Rev Respir Dis* 1979;119(2):239-245.
21. Wollmer P, Ursing K, Midgren B, Eriksson L. Inefficiency of chest percussion in the physical therapy of chronic bronchitis. *Eur J Respir Dis* 1985;66(4):233-239.
22. Pavia D, Thomson ML, Phillipakos D. A preliminary study of the effect of a vibrating pad on bronchial clearance. *Am Rev Respir Dis* 1976;113(1):92-96.
23. Maxwell M, Redmond A. Comparative trial of manual and mechanical percussion technique with gravity-assisted bronchial drainage in patients with cystic fibrosis. *Arch Dis Child* 1979;54(7):542-544.
24. Holody B, Goldberg HS. The effect of mechanical vibration physiotherapy on arterial oxygenation in acutely ill patients with atelectasis or pneumonia. *Am Rev Respir Dis* 1981;124(4):372-375.
25. Radford R, Barutt J, Billingsley JG, Hill W, Lawson WH, Willich W. A rational basis for percussion augmented mucociliary clearance. *Respir Care* 1982;27(5):556-563.
26. Pryor JA, Webber BA, Hodson ME. Effect of chest physiotherapy on oxygen saturation in patients with cystic fibrosis. *Thorax* 1990; 45(1): 77
27. Newton DAG, Stephenson A. The effect of physiotherapy on pulmonary function: a laboratory study. *Lancet* 1978;2(8083):228-230.
28. MacKenzie CF, Shin B, McAslan TC. Chest physiotherapy: the effect on arterial oxygenation. *Anesth Analg* 1978;57(1):28-30.
29. Stiller K, Geake T, Taylor J, Grant R, Hall B. Acute lobar atelectasis: a comparison of two chest physiotherapy regimens. *Chest* 1990;98(6):1336-1340.



30. Pryor JA, Webber BA, Hodson ME, Batten JC. Evaluation of the forced expiration technique as an adjunct to postural drainage in treatment of cystic fibrosis. *Br Med J* 1979(6187);2:417-418.
31. Barrell SE, Abbas HM. Monitoring during physiotherapy after open heart surgery. *Physiotherapy* 1978; 64(90):272-273.
32. Connors AF, Hammon WE, Martin RJ, Rogers RM. Chest physical therapy: the immediate effect on oxygenation in acutely ill patients. *Chest* 1980;78(4):559-564.
33. Hammon WE, Martin RJ. Chest physical therapy for acute atelectasis. *Phys Ther* 1981;61(2):217-220.
34. AARC Clinical Practice Guideline, Respiratory Care 1993;38(5):495-499.

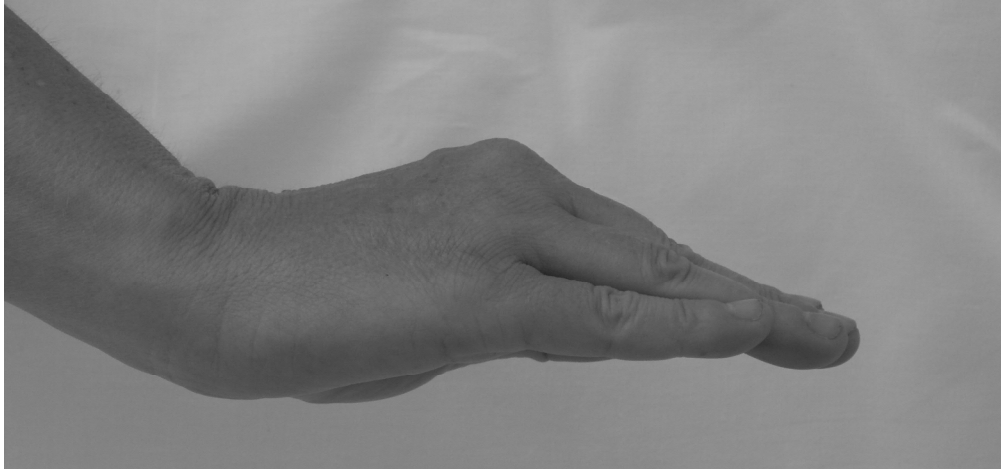

714x334mm (96 x 96 DPI)

Review

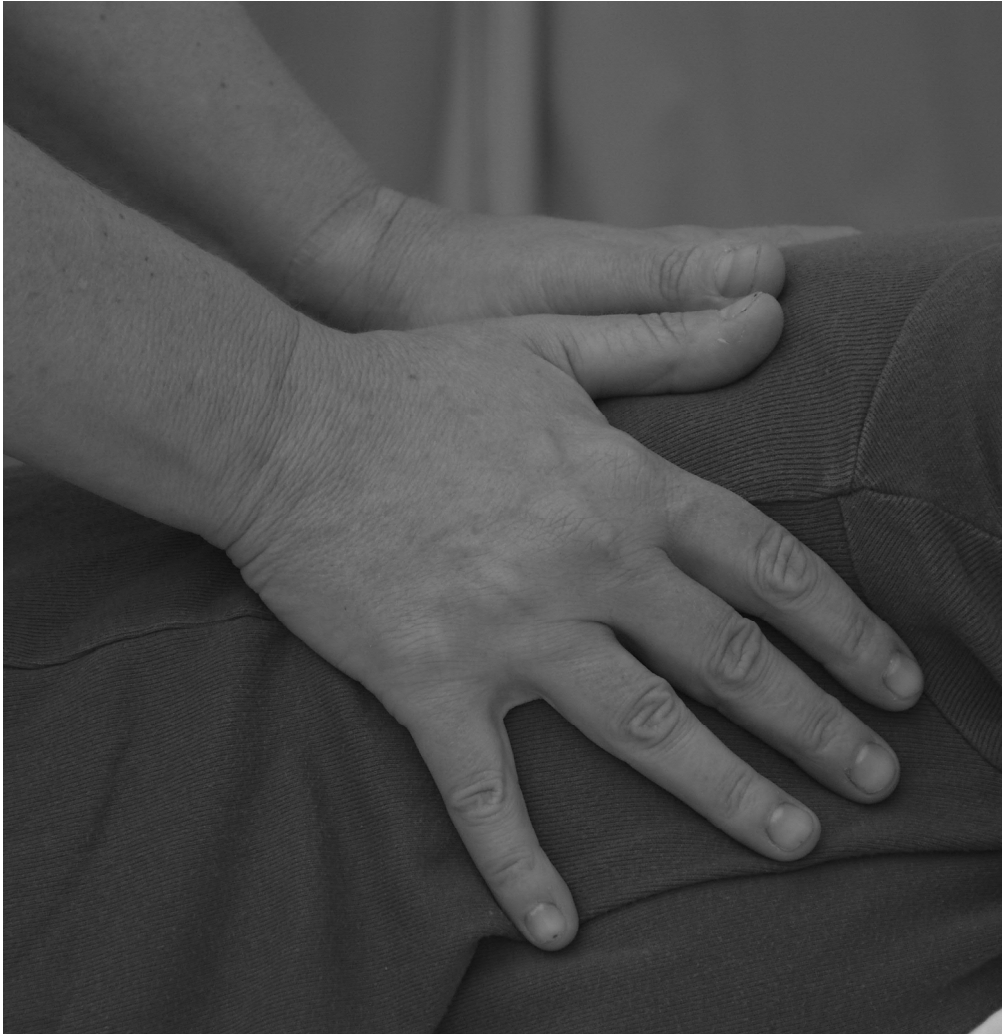

580x598mm (96 x 96 DPI)

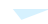

Supplement: RC-01312.R2_Cross_Suppl_Aug_2012.pdf [file RC-01312.R2_Cross_Suppl_Aug_2012.pdf]
